# Supplementary material
Source: Research Square preprint supplement (doi:10.21203/rs.3.rs-9167651/v1)
Supplement: Supplementary file 1 [file c341ebb8e01dbd3847378bab.xlsx]

## Sheet: Sheet1
Common name
CA2
CA1
CA4
CYP19A1
CES1
CES2
ADH1A
ADH1C
ACHE
PARP1
NR1I3
MAOB
ADH1B
P2RX7
ACE
HTR7
CTSK
CHRM4
CHRM5
CHRM2
CHRM1
CHRM3
PARP10
EPHX1
SLC5A7
ADH4
KAT2B
CHRNA3 CHRNB4
GABRB3 GABRG2 GABRA5
MGLL
SLC6A3
CTSC
GSK3B
CTSB
NQO2
NOS2
IMPDH2
MCL1
MPO
PDE7A
METAP1
LRRK2
RGS4
GABRB3 GABRA3 GABRG2
GABRB3 GABRG2 GABRA1
GABRA2 GABRB3 GABRG2
GABRG2 GABRB3 GABRA6
DRD2
BRD9
CHRNA4 CHRNB2
CHRNA7
TYMS
DRD4
SLC6A2
CTSL
IDO1
SIRT2
CYP11B1
SLC6A4
CYP11B2
GRM4
AR
HPGDS
TDO2
TPO
PIN1
HMOX1
HDAC8
TGM2
NOS1
NOS3
F13A1
CA12
CA9
SIGMAR1
CHEK1
SRD5A1
MAOA
MAPK14
MTNR1A
EPHX2
GRM5
SRD5A2
ALOX5
CTSS
TYK2
GABRA1
PTPN1
GABRA5
MTNR1B
CDC25B
MALT1
PTGS2
MMP13
MMP1
CA5A
BCHE
TERT
PTPRC
F2
AKR1B1
HDAC3
HMGCR
FYN
LCK
EGLN1
DPP4
SHH
EPHX1
TRPM8
CA4
SRD5A2
DAO
BBOX1
AR
ESR1
ESR2
SHBG
CDC25A
CDC25B
NR1I3
GRIN1
FOLH1
NOS1
NOS2
NOS3
PIK3CA PIK3R1
NR1H4
UGT2B7
GPBAR1
PYGL
NPC1L1
AHCY
CASP3
CHRM1
HCAR2
CA2
DYRK1A
CDK9
CLK1
FBP1
HAO2
TK1
PTGS1
PTGS2
HSD11B1
NR1H3
CASP6
CASP7
CASP8
CASP2
AKR1C3
AKR1C2
RNASEH1
KDM4C
FDPS
KDM6B
CA12
CA9
FUCA1
GRIK1
POLA1
CAPN2
MAP2K1
CAPN1
METAP2
CA1
DHODH
HDAC1
DYRK2
CDA
DYRK1B
CLK2
CLK4
TYMS
CCR2
GPR35
CYP19A1
PTK2B
KDM4E
SLCO1B1
KDM5C
TERT
KDM4A
KDM4D
ADORA2A
GSR
AOC3
CPA1
WDR5
ABCC1
HSPA1A
ANPEP
RNPEP
CYP51A1
SLC22A6
EGLN1
HDAC3
ADH1A
ADH1B
DPP4
DPP8
CA2
CA1
DPP9
FYN
EPHX2
GSK3B
NOS1
NOS2
NOS3
CHRM1
DPP7
TRPA1
CES1
CES2
FAAH
CYP11B1
TGM2
CHRNA4 CHRNB2
CHRNA7
BRD9
PARP1
CA12
CA9
ADH1C
MAPK14
F13A1
CA3
CA13
SRD5A1
SRD5A2
HSD17B7
PLK1
CHRNA3 CHRNB4
CHRM2
CYP11B2
MALT1
TPO
MPO
ADH7
KISS1R
BCHE
BBOX1
MAOB
PARP10
IDO1
CDC25B
TYMS
DNMT1
DNMT3L DNMT3A
KAT2B
PTPN22
PTPRC
PTPN1
CYP2A6
PTGER4
PTGER2
PTGER3
CYP19A1
NQO2
ADRA2B
PTGS1
DUSP1
DNM1
MCL1
CTSK
CTRC
ELANE
CTSG
METAP1
HSD11B1
MAOA
SLC6A3
MAP2K1
RGS4
EGFR
HSP90AA1
HDAC3
HDAC6
HDAC2
ITGA2B ITGB3
NCOR2 HDAC3
RNPEP
DNPEP
HDAC1
HDAC11
HDAC10
NQO1
PLA2G2C
PLA2G10
ALOX5
HPGDS
QPCT
IMPDH2
EPHX1
CHRNA4
GSR
CYP2A6
PPP5C
PPP1CA
PPM1B
NISCH
PPP1CC
CTSK
BBOX1
IDO1
CHRM4
CHRM2
PTGS2
PTPN1
CHRNA4
CHRNA3
ACHE
MTNR1A
PLAUR
CA2
CA1
CA12
CA9
OXTR
G6PD
MAOB
NOX4
ELANE
AOC3
EPHX1
CHRM3
EPHX2
CTSL
HSD11B1
DPP4
NR1H4
CTSB
CHRNA4 CHRNB2
CPT1A
NAAA
CHRM1
PPARA
TRPV1
MAOB
UGT2B7
NR1I3
CXCR3
AR
ESR1
CHRM2
SLC6A2
SLC6A4
CYP2C19
TRPA1
ADORA3
AHR
CYP1A2
CNR2
BCHE
PTPN1
FADS1
RELA
P2RX7
PTPN2
HSD11B2
NR1H3
NR5A2
MTNR1A
CCNB3 CDK1 CCNB1 CCNB2
CTSS
SQLE
RORC
SREBF2
NPC1L1
FABP4
PPARG
ESR2
CTSD
TERT
SHBG
FABP3
CYP17A1
FABP5
CDC25A
PPARD
HMGCR
CDC25B
FABP1
CYP51A1
FAAH
CTSC
CTSK
CTSL
CTSB
SRD5A1
SRD5A2
NR3C2
NR3C1
CES1
SERPINA6
NR1I2
SCD
MGLL
DRD2
HRH3
SLC6A9
CHRNA3 CHRNB4
TOP1
ATP12A
RBP4
PTPN6
ALPL
NR5A1
HPGD
CA2
CA6
DBH
CA4
KCNA3
LSS
CES2
PREP
FFAR1
PTGES
ACHE
CYP19A1
PTGS2
PGR
HSD11B1
PTGS1
CNR1
SIGMAR1
HSD17B3
CCR5
SLC6A2
TACR2
SLC6A3
HMGCR
HDAC6
CYP17A1
CYP19A1
HDAC1
FNTA FNTB
VDR
MAPK14
PDE2A
PDE10A
NR1H4
UGCG
KCNK3
HDAC2
F2
MDM2
APP
HCRTR2
HCRTR1
S1PR3
S1PR1
HSD11B1
GSK3B
PTGS2
IDH1
EPHX2
MDM4
PRCP
PRKCA
AVPR1A
PDE4D
ITGAL ICAM1 ITGB2
TACR1
ITK
FDFT1
TOP1
SMYD2
TYRO3
MERTK
PSEN2 PSENEN NCSTN APH1A PSEN1 APH1B
C5AR1
PYGL
PYGM
CYP51A1
MTNR1A
MTNR1B
CCR1
HSD17B3
AURKB
NTRK1
JAK2
CDK1
SLC16A1
AURKA
ACKR3
SCD
ALOX5
F10
SLC10A2
FASN
KCNA5
KIF11
SMO
PTGES
PGGT1B FNTA
PFKFB3
MAP3K20
TGFBR2
TGFBR1
PIM1
GRM5
PIK3CA
CXCR3
AXL
GRM2
PIM3
PTPN1
CSF1R
ABL1
FLT1
PDGFRB
KIT
IGF1R
FLT3
INSR
RET
LCK
SYK
SRC
MST1R
FGFR3
ZAP70
MET
BMX
LYN
FGFR4
ALK
GBA
FOLH1
AKR1B1
KDM4E
KDM2A
PHF8
KDM5C
DAO
CA1
CA9
TLR4
HCAR2
DPP4
CASP3
FUCA1
P4HTM
DDO
HCAR2
DDO
SIRT3
SIRT2
SLC22A6
FYN
LCK
PTPN1
P4HA1
TLR4
EGLN3
CYP19A1
CYP11B2
FUCA1
PARP1
HAAO
ERN1
PIM3
P4HTM
NOS2
NOS3
CYP11B1
CYP3A4
NOS1
PIM2
CPA1
FEN1
IKBKB
CYP17A1
PIM1
DAO
TOP2A
RAF1
IMPDH2
CYP2A6
GRM5
CPA3
CPB2
GABRA1 GABRB2 GABRG2
ERCC5
HSD11B1
KIF11
SRD5A2
CHRNA4 CHRNB2
GABRA3 GABRB2 GABRG2
FOLH1
CA12
CA9
JAK2
CA2
DHODH
AKR1B1
PSEN2 PSENEN NCSTN APH1A PSEN1 APH1B
HDAC3
HDAC2
HDAC1
SGK1
PTGS1
PTGS2
TTR
KCNA5
MDH2
DYRK1A
DHFR
MLYCD
CYP51A1
MIF
CCR1
ADORA2A
KDM4E
KDM4A
KDM4D
KDM4C
CA1
HSP90AA1
GPR35

## Sheet: Sheet2
CA2
CA1
CA4
CYP19A1
CES1
CES2
ADH1A
ADH1C
ACHE
PARP1
NR1I3
MAOB
ADH1B
P2RX7
ACE
HTR7
CTSK
CHRM4
CHRM5
CHRM2
CHRM1
CHRM3
PARP10
EPHX1
SLC5A7
ADH4
KAT2B
CHRNA3
GABRB3
MGLL
SLC6A3
CTSC
GSK3B
CTSB
NQO2
NOS2
IMPDH2
MCL1
MPO
PDE7A
METAP1
LRRK2
RGS4
GABRB3
GABRB3
GABRA2
GABRG2
DRD2
BRD9
CHRNA4
CHRNA7
TYMS
DRD4
SLC6A2
CTSL
IDO1
SIRT2
CYP11B1
SLC6A4
CYP11B2
GRM4
AR
HPGDS
TDO2
TPO
PIN1
HMOX1
HDAC8
TGM2
NOS1
NOS3
F13A1
CA12
CA9
SIGMAR1
CHEK1
SRD5A1
MAOA
MAPK14
MTNR1A
EPHX2
GRM5
SRD5A2
ALOX5
CTSS
TYK2
GABRA1
PTPN1
GABRA5
MTNR1B
CDC25B
MALT1
PTGS2
MMP13
MMP1
CA5A
BCHE
TERT
PTPRC
F2
AKR1B1
HDAC3
HMGCR
FYN
LCK
EGLN1
DPP4
SHH
TRPM8
DAO
BBOX1
ESR1
ESR2
SHBG
CDC25A
GRIN1
FOLH1
PIK3CA
NR1H4
UGT2B7
GPBAR1
PYGL
NPC1L1
AHCY
CASP3
HCAR2
DYRK1A
CDK9
CLK1
FBP1
HAO2
TK1
PTGS1
HSD11B1
NR1H3
CASP6
CASP7
CASP8
CASP2
AKR1C3
AKR1C2
RNASEH1
KDM4C
FDPS
KDM6B
FUCA1
GRIK1
POLA1
CAPN2
MAP2K1
CAPN1
METAP2
DHODH
HDAC1
DYRK2
CDA
DYRK1B
CLK2
CLK4
CCR2
GPR35
PTK2B
KDM4E
SLCO1B1
KDM5C
KDM4A
KDM4D
ADORA2A
GSR
AOC3
CPA1
WDR5
ABCC1
HSPA1A
ANPEP
RNPEP
CYP51A1
SLC22A6
DPP8
DPP9
DPP7
TRPA1
FAAH
CA3
CA13
HSD17B7
PLK1
CHRNA3
ADH7
KISS1R
DNMT1
DNMT3L
PTPN22
CYP2A6
PTGER4
PTGER2
PTGER3
ADRA2B
DUSP1
DNM1
CTRC
ELANE
CTSG
EGFR
HSP90AA1
HDAC6
HDAC2
ITGA2B
NCOR2
DNPEP
HDAC11
HDAC10
NQO1
PLA2G2C
PLA2G10
QPCT
CHRNA4
PPP5C
PPP1CA
PPM1B
NISCH
PPP1CC
CHRNA3
PLAUR
OXTR
G6PD
NOX4
CPT1A
NAAA
PPARA
TRPV1
CXCR3
CYP2C19
ADORA3
AHR
CYP1A2
CNR2
FADS1
RELA
PTPN2
HSD11B2
NR5A2
CCNB3
SQLE
RORC
SREBF2
FABP4
PPARG
CTSD
FABP3
CYP17A1
FABP5
PPARD
FABP1
NR3C2
NR3C1
SERPINA6
NR1I2
SCD
HRH3
SLC6A9
TOP1
ATP12A
RBP4
PTPN6
ALPL
NR5A1
HPGD
CA6
DBH
KCNA3
LSS
PREP
FFAR1
PTGES
PGR
CNR1
HSD17B3
CCR5
TACR2
FNTA
VDR
PDE2A
PDE10A
UGCG
KCNK3
MDM2
APP
HCRTR2
HCRTR1
S1PR3
S1PR1
IDH1
MDM4
PRCP
PRKCA
AVPR1A
PDE4D
ITGAL
TACR1
ITK
FDFT1
SMYD2
TYRO3
MERTK
PSEN2
C5AR1
PYGM
CCR1
AURKB
NTRK1
JAK2
CDK1
SLC16A1
AURKA
ACKR3
F10
SLC10A2
FASN
KCNA5
KIF11
SMO
PGGT1B
PFKFB3
MAP3K20
TGFBR2
TGFBR1
PIM1
PIK3CA
AXL
GRM2
PIM3
CSF1R
ABL1
FLT1
PDGFRB
KIT
IGF1R
FLT3
INSR
RET
SYK
SRC
MST1R
FGFR3
ZAP70
MET
BMX
LYN
FGFR4
ALK
GBA
KDM2A
PHF8
TLR4
P4HTM
DDO
SIRT3
P4HA1
EGLN3
HAAO
ERN1
CYP3A4
PIM2
FEN1
IKBKB
TOP2A
RAF1
CPA3
CPB2
GABRA1
ERCC5
GABRA3
SGK1
TTR
MDH2
DHFR
MLYCD
MIF
APH1B
PSENEN
NCSTN
APH1A
PSEN1
ICAM1
ITGB2
CDK1
CCNB2
CCNB1
FNTB
HDAC3
ITGB3
DNMT3A
CHRNB4
PIK3R1
GABRA6
CHRNB2
